# Supplementary material for: An investigation of the role of surface nitrate species in the oxidation of propene on a Pt-based diesel oxidation catalyst
Source: Royal Society of Chemistry journal article supplement (doi:10.1039/c3cy00349c), 2013-01-01
Supplement: c3cy00349c.pdf [file c3cy00349c.pdf]

## Supporting Materials

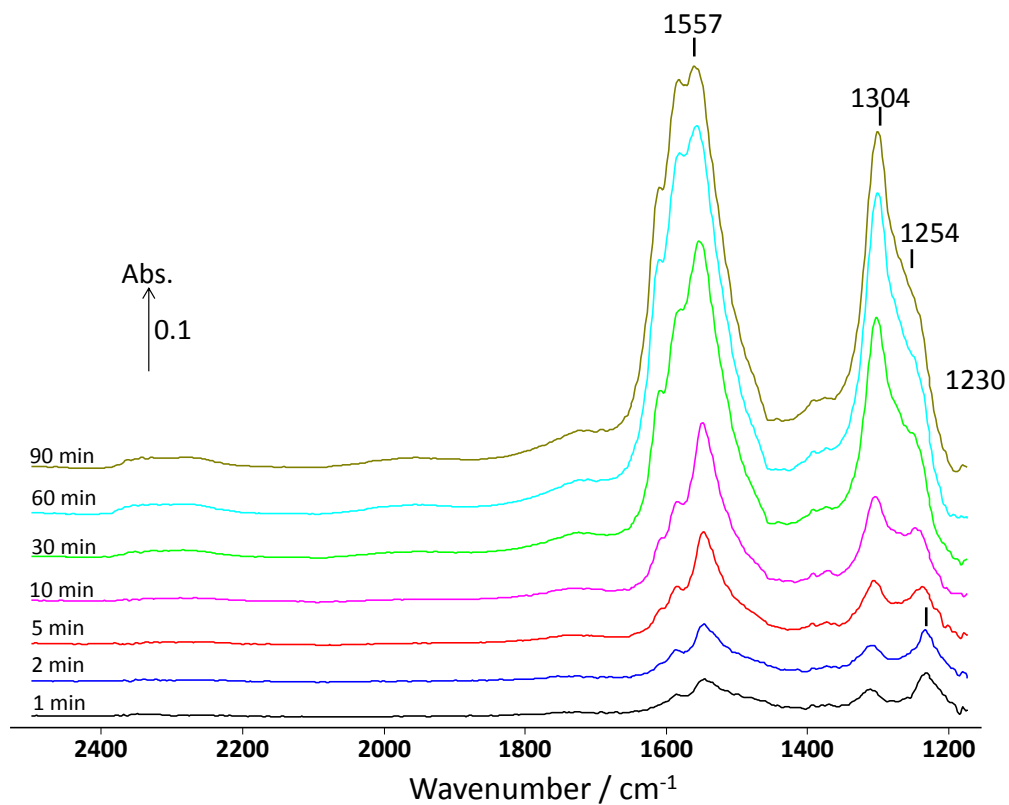

**Figure S1** Changes in the surface species obtained from the DRIFTS-MS system as a function of time on stream over the course of 90 min under NO+O<sub>2</sub> over 1% Pt/Al<sub>2</sub>O<sub>3</sub> at 250 °C. Feed conditions: 500 ppm NO, 500 ppm C<sub>3</sub>H<sub>6</sub>, 5% O<sub>2</sub>, Kr (when added) and Ar balance.

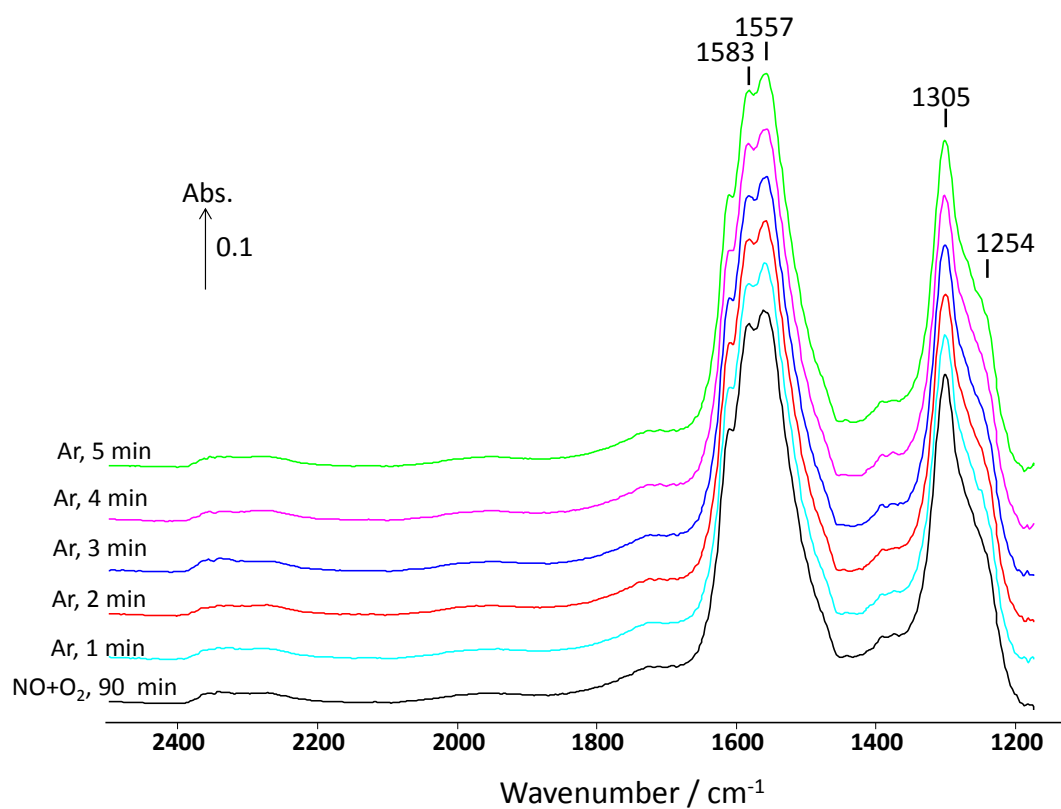

**Figure S2** Changes in the surface species obtained from the DRIFTS-MS system: nitrates ( $1308, 1256 \text{ cm}^{-1}$ ) as a function of time on stream over the course of 5 min under Ar flow over 1% Pt/Al<sub>2</sub>O<sub>3</sub> at 250 °C. Feed conditions: 500 ppm NO, 500 ppm C<sub>3</sub>H<sub>6</sub>, 5% O<sub>2</sub>, Kr (when added) and Ar balance.
